# Supplementary material for: From formalism to intuition: probing the role of the trochee in German nominal plural forms in L1 and L2 German speakers
Source: Frontiers journal article supplement (doi:10.3389/flang.2024.1338625), 2024-12-13
Supplement: Data_Sheet_1.pdf [file Data_Sheet_1.pdf]

## Supplementary Material

# From Formalism to Intuition: Probing the Role of the Trochee in German Nominal Plural Forms in L1 and L2 German Speakers

Katharina S. Schuhmann\*, Laura Catharine Smith

\* Correspondence: Corresponding Author: [Katharina.Schuhmann@uni-oldenburg.de](mailto:Katharina.Schuhmann@uni-oldenburg.de)

## 1 Supplementary Figures

### 1.1 Supplementary Figures to 4.2 Results Task 2: real word plural elicitation task

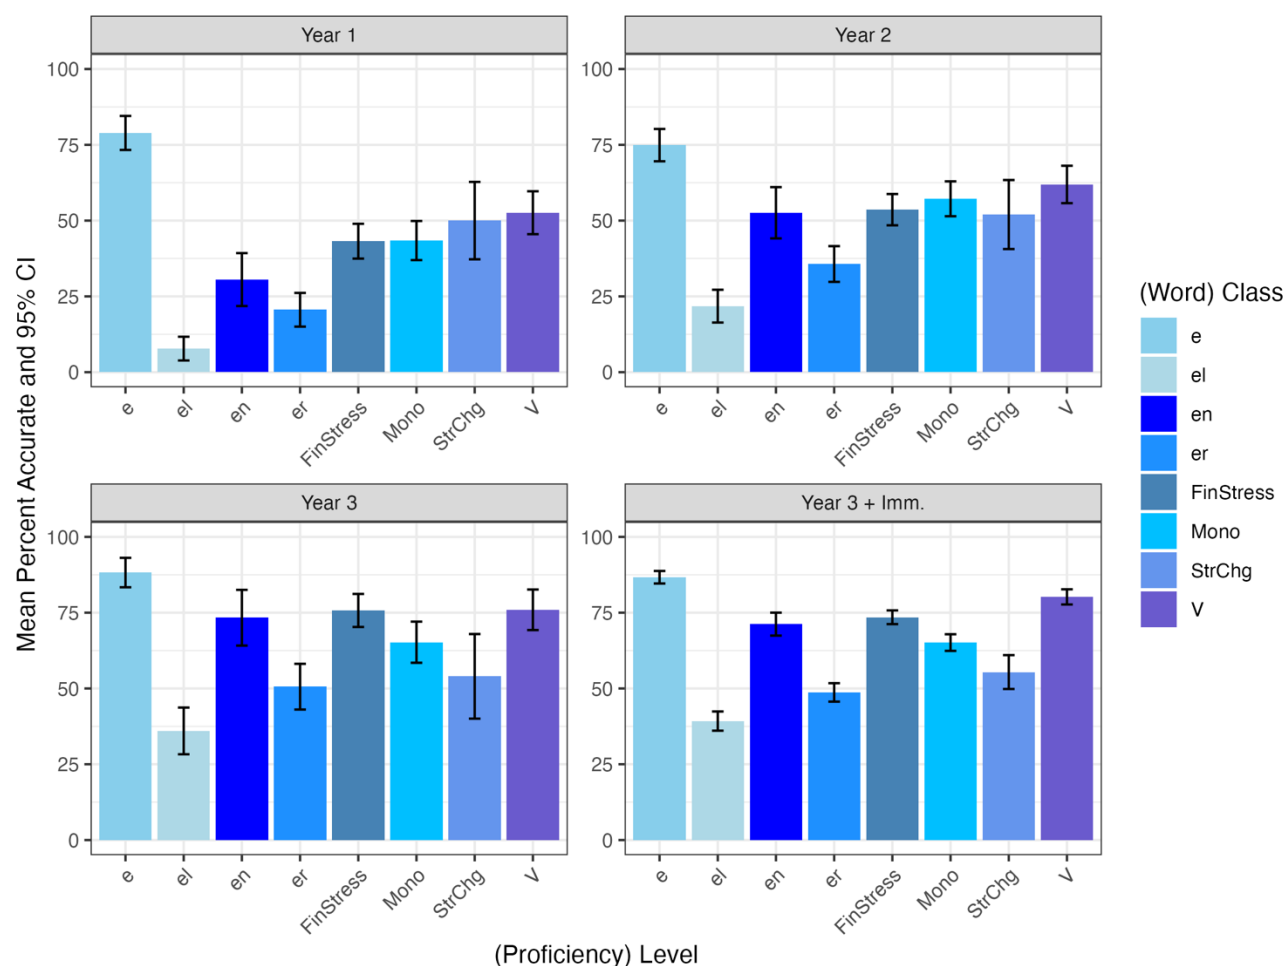

**Supplementary Figure 1.** Percent Accurate plural forms in the plural elicitation task with real words (Task 2) in L2 speakers, split by (proficiency) Level and (word) Class.

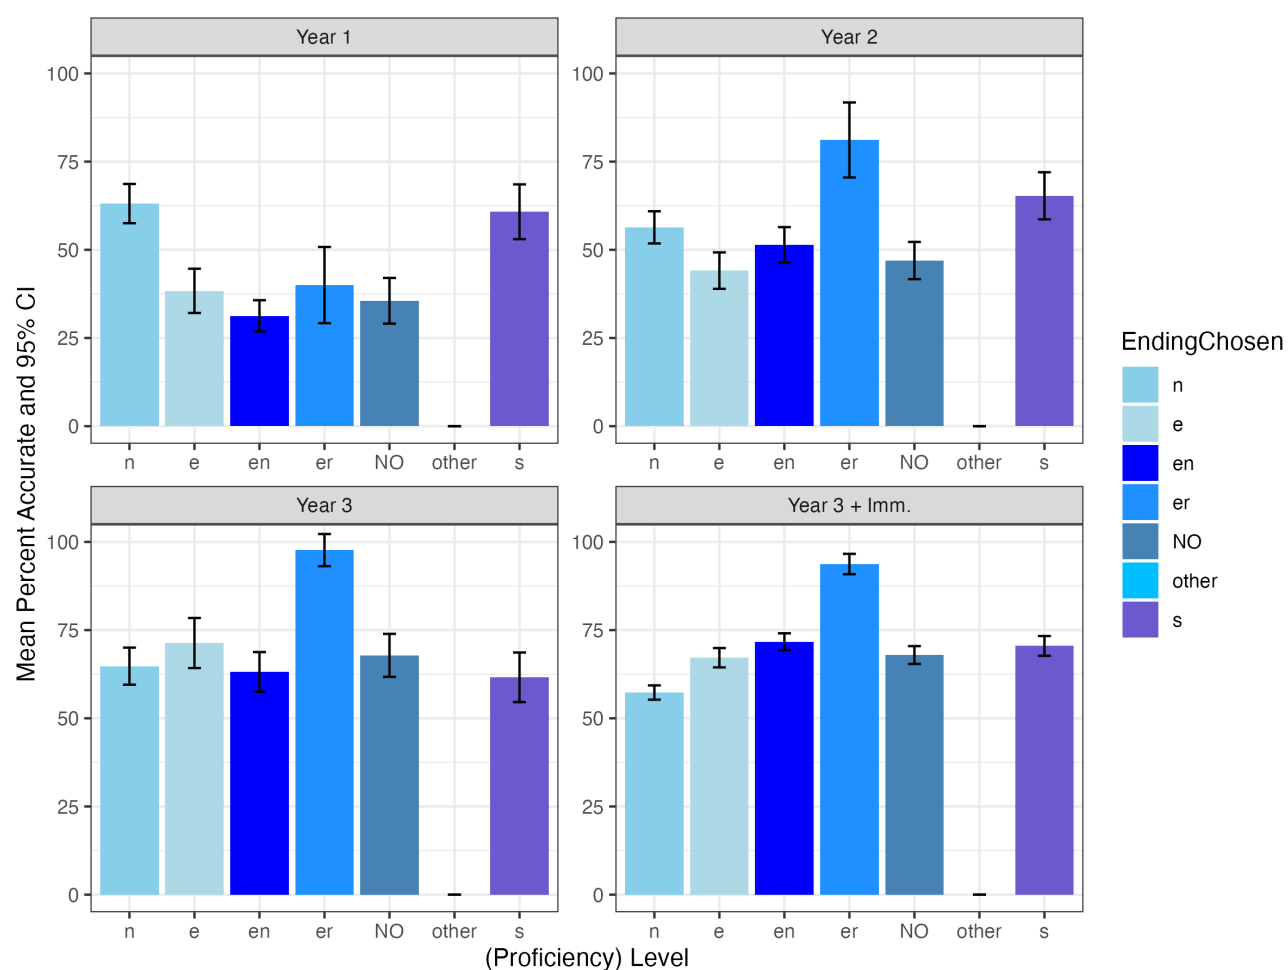

**Supplementary Figure 2.** Percent Accurate plural forms in the plural elicitation task with real words (Task 2) in L2 speakers, split by (proficiency) Level and EndingChosen (i.e., suffixes produced).

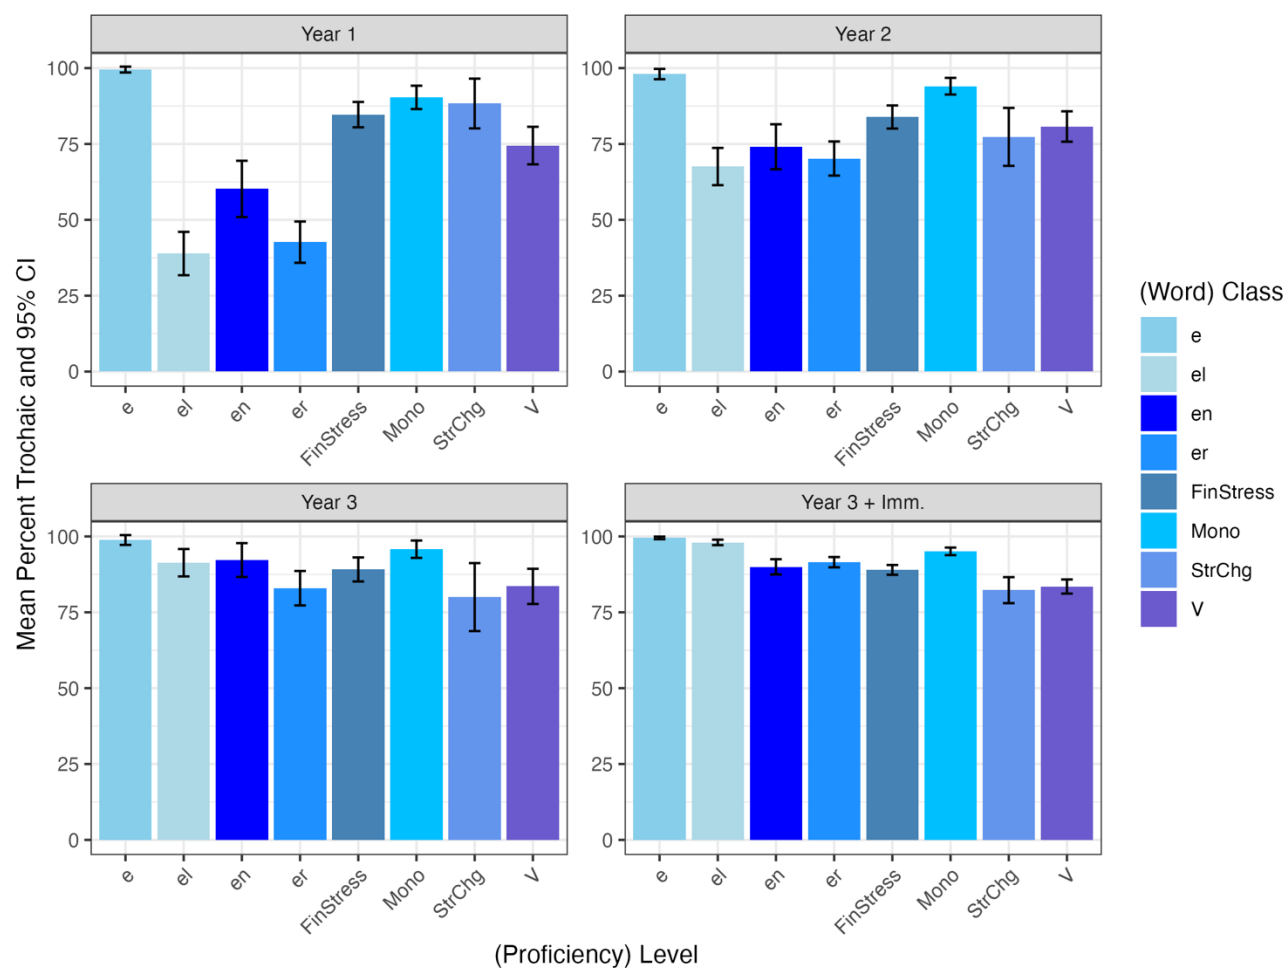

**Supplementary Figure 3.** Percent Trochaic plural forms in the plural elicitation task with real words (Task 2) in L2 speakers, split by (proficiency) Level and (word) Class.

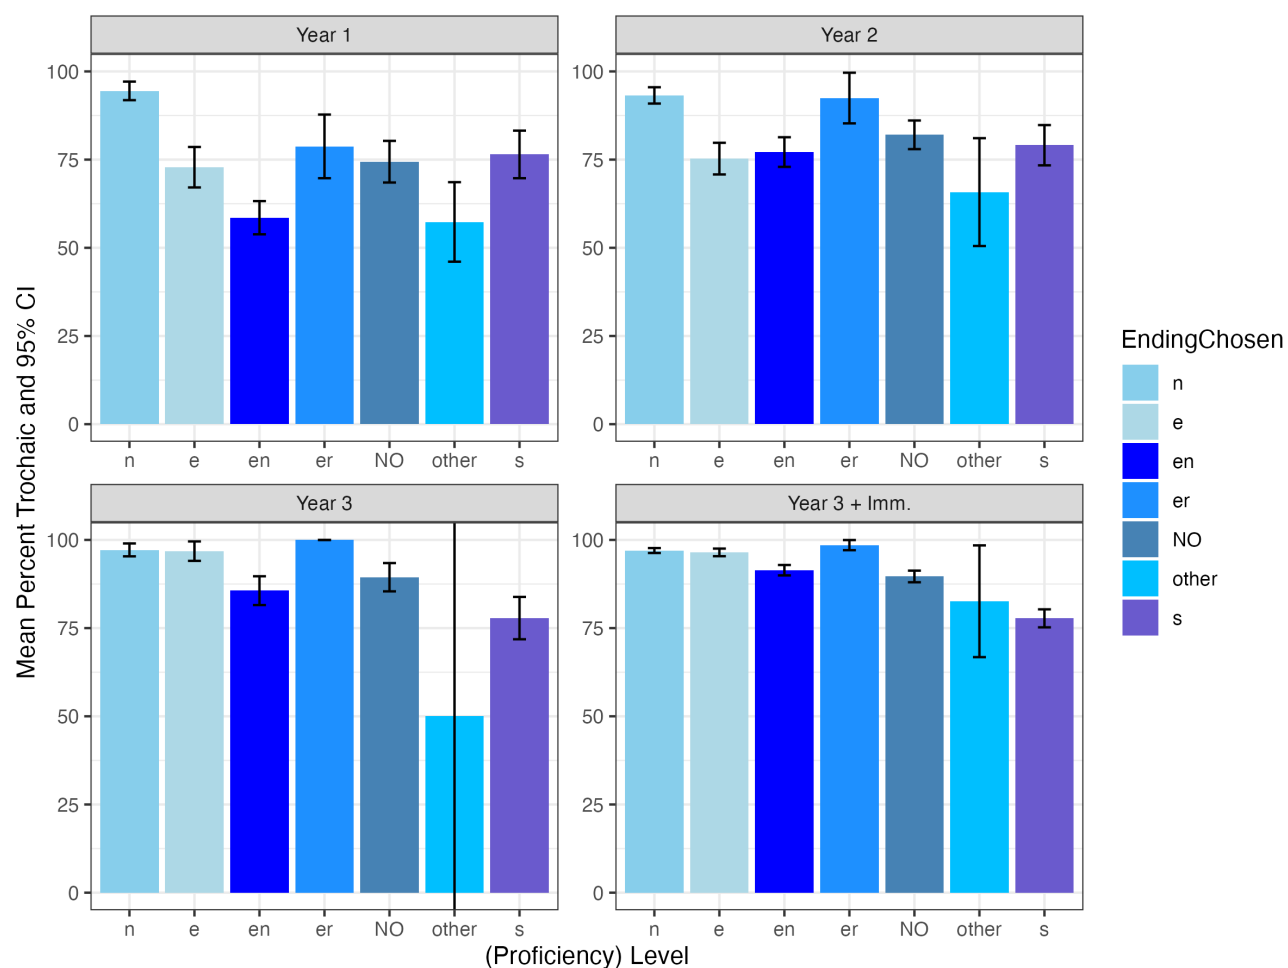

**Supplementary Figure 4.** Percent Trochaic plural forms in the plural elicitation task with real words (Task 2) in L2 speakers, split by (proficiency) Level and EndingChosen (i.e., suffixes produced).

## 1.2 Supplementary Figure to 4.2.4 Percent Trochaic of incorrect plurals

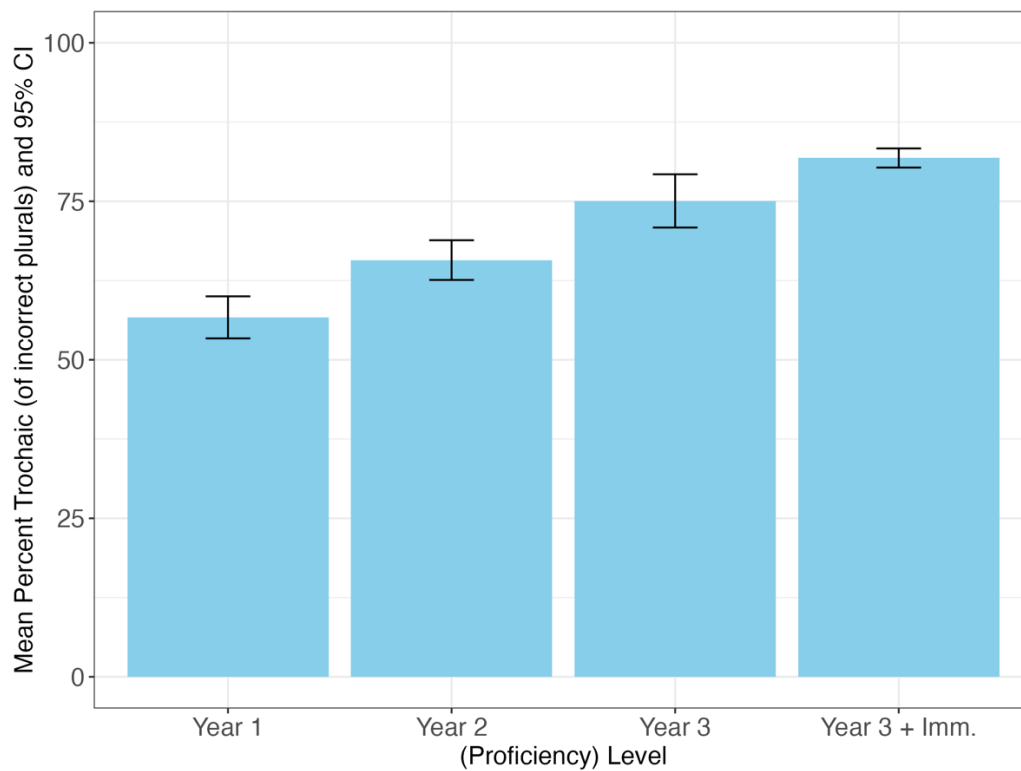

**Supplementary Figure 5.** Percent Trochaic plural forms of only the incorrect items in the plural elicitation task with real words (Task 2) in L2 speakers, split by (proficiency) Level.

### 1.3 Supplementary Figure to 4.3.2 Ratings by (word) Class and Ending

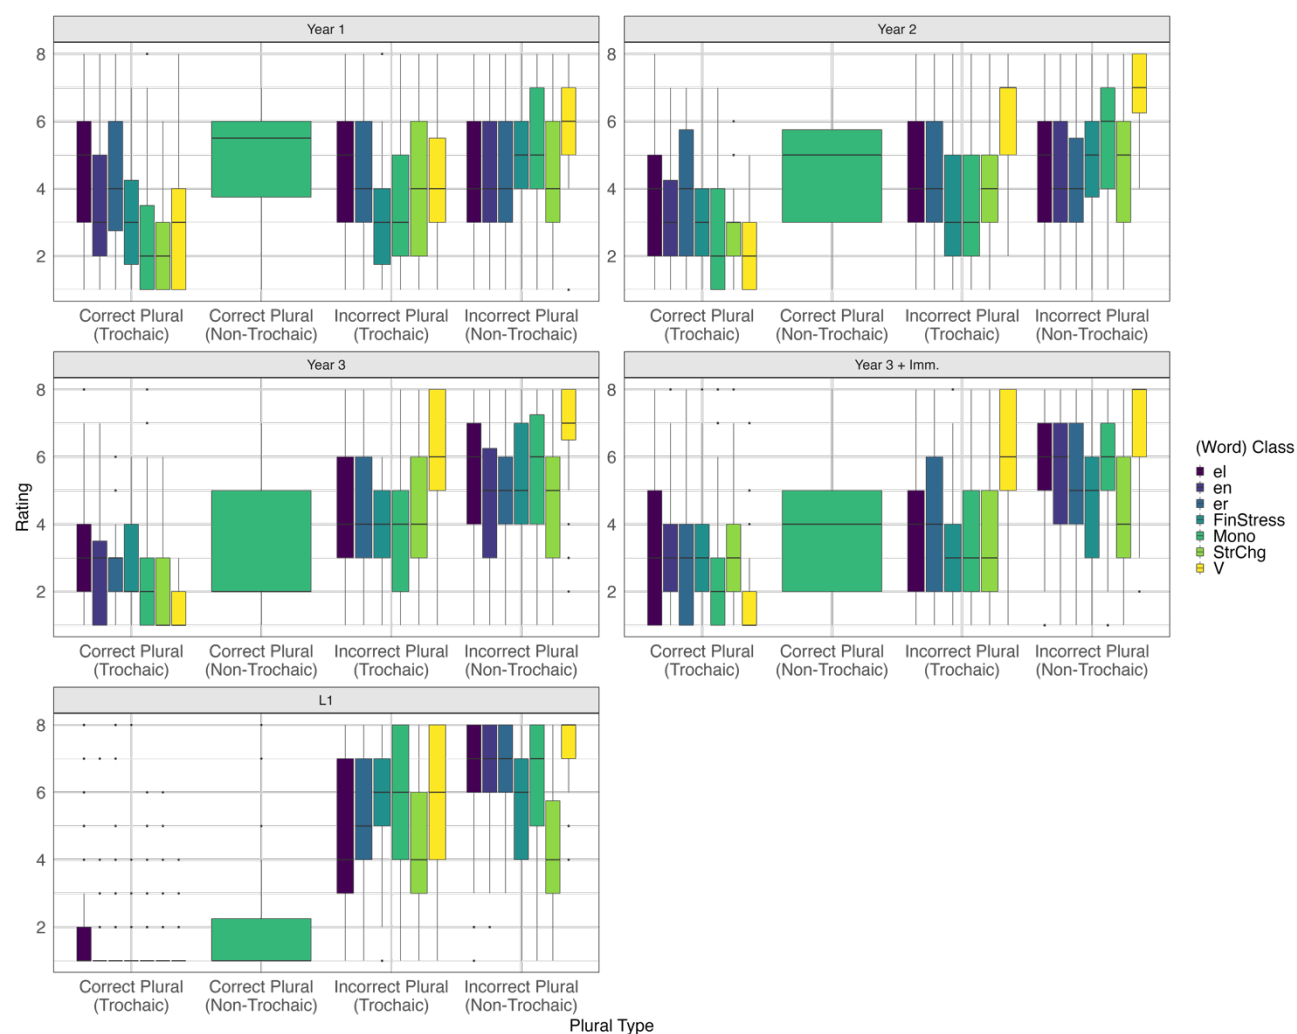

**Supplementary Figure 6.** L2 and L1 users' well-formedness ratings on the grammatical acceptability judgment task (GAJT, Task 3), split by (proficiency) Level, Plural Type, and (word) Class.

## 2 Supplementary Tables

### 2.1 Supplementary Table to 4.2.4 Percent Trochaic of incorrect plurals

#### 2.1.1 Supplementary Table 1: Model summary for Percent Trochaic plural forms in the plural elicitation task with real words (incorrect plurals only) in L2 speakers (Task 2).

|                                  | Estimate | Std. error | z-value | p-value |
|----------------------------------|----------|------------|---------|---------|
| (Intercept)                      | 6.950    | 0.779      | 8.927   | <.001   |
| Level1: Y1 vs. Y2                | 0.284    | 0.290      | 0.979   | .328    |
| Level2: Y1+2 vs. Y3              | 1.128    | 0.322      | 3.506   | <.001   |
| Level3: Y1-3 vs. Y3+             | 1.178    | 0.216      | 5.454   | <.001   |
| Class: <i>-el</i> vs. <i>-e</i>  | -4.821   | 0.855      | -5.641  | <.001   |
| Class: <i>-en</i> vs. <i>-e</i>  | -3.744   | 0.909      | -4.118  | <.001   |
| Class: <i>-er</i> vs. <i>-e</i>  | -4.829   | 0.846      | -5.707  | <.001   |
| Class: FinStress vs. <i>-e</i>   | -1.881   | 0.826      | -2.278  | .023    |
| Class: Mono vs. <i>-e</i>        | -1.021   | 0.859      | -1.188  | .235    |
| Class: StrChg vs. <i>-e</i>      | -2.267   | 1.043      | -2.174  | .030    |
| Class: <i>-V</i> vs. <i>-e</i>   | -2.960   | 0.864      | -3.424  | <.001   |
| Ending: <i>-e</i> vs. <i>-n</i>  | -2.469   | 0.226      | -10.931 | <.001   |
| Ending: <i>-en</i> vs. <i>-n</i> | -3.315   | 0.209      | -15.884 | <.001   |
| Ending: <i>-er</i> vs. <i>-n</i> | -2.759   | 0.400      | -6.906  | <.001   |
| Ending: NO vs. <i>-n</i>         | -2.864   | 0.220      | -12.996 | <.001   |
| Ending: other vs. <i>-n</i>      | -2.199   | 0.316      | -6.960  | <.001   |
| Ending: <i>-s</i> vs. <i>-n</i>  | -2.548   | 0.233      | -10.912 | <.001   |
